# Supplementary material for: A method for utilizing automated machine learning for histopathological classification of testis based on Johnsen scores
Source: PubMed Central journal article supplement (PMC8107178; doi:10.1038/s41598-021-89369-z), 2021-05-10
Supplement: 41598_2021_89369_MOESM1_ESM.pdf [file 41598_2021_89369_MOESM1_ESM.pdf]

## **A method for utilizing automated machine learning for histopathological classification of testis based on Johnsen scores**

Yurika Ito<sup>1</sup>, Mami Unagami<sup>1</sup>, Fumito Yamabe<sup>1</sup>, Yozo Mitsui<sup>1</sup>, Koichi Nakajima<sup>1</sup>, Koichi Nagao<sup>1</sup>, Hideyuki Kobayashi<sup>1,\*</sup>

<sup>1</sup> Department of Urology, Toho University School of Medicine, Tokyo, Japan

\*To whom correspondence should be addressed: Department of Urology, Toho University School of Medicine, Tokyo, Japan, 6-11-1, Omori-Nishi, Ota-ku, Tokyo 143-8541, Japan

TEL +81-3-3762-4151      FAX +81-3-3768-8817

E-mail: [hideyukk@med.toho-u.ac.jp](mailto:hideyukk@med.toho-u.ac.jp)

## **Supplementary data**

**All statistical analyses for JSC\_classifier: an image dataset of 7155 magnification images (X400) and JSC\_classifier\_Part2: an image dataset of 9822 expansion images (5.0 X 5.0 cm)**

## JSC\_classifier: an image dataset of 7155 magnification images (X400)

The average precision (positive predictive value) of the algorithm was 82.6%, precision was 80.31%, and recall was 60.96% for all labels.

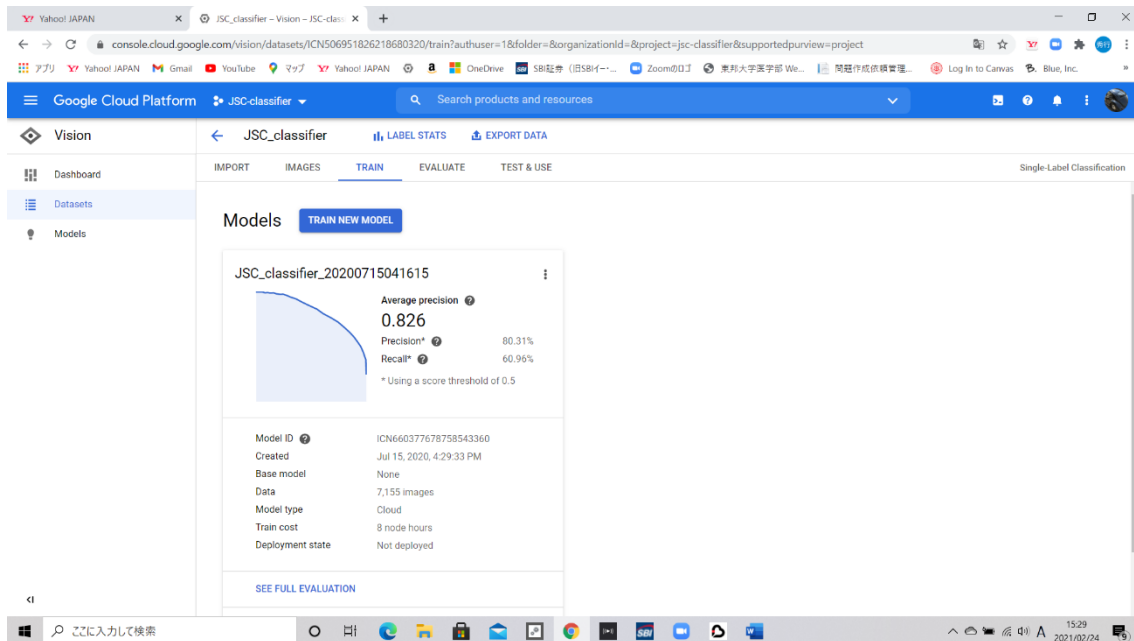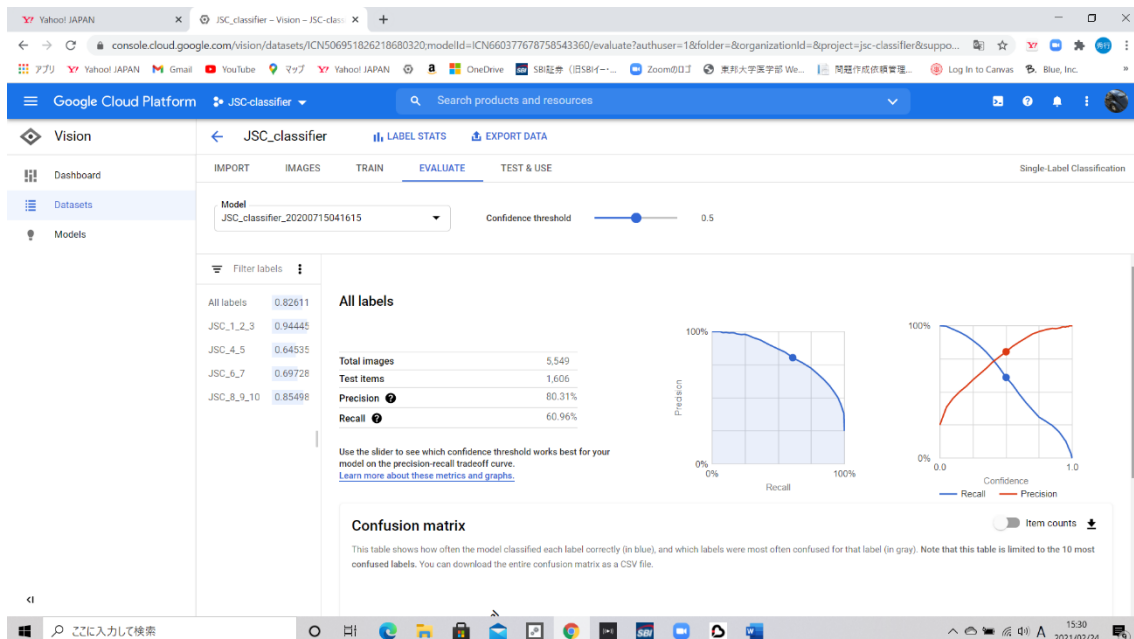

# Confusion matrix

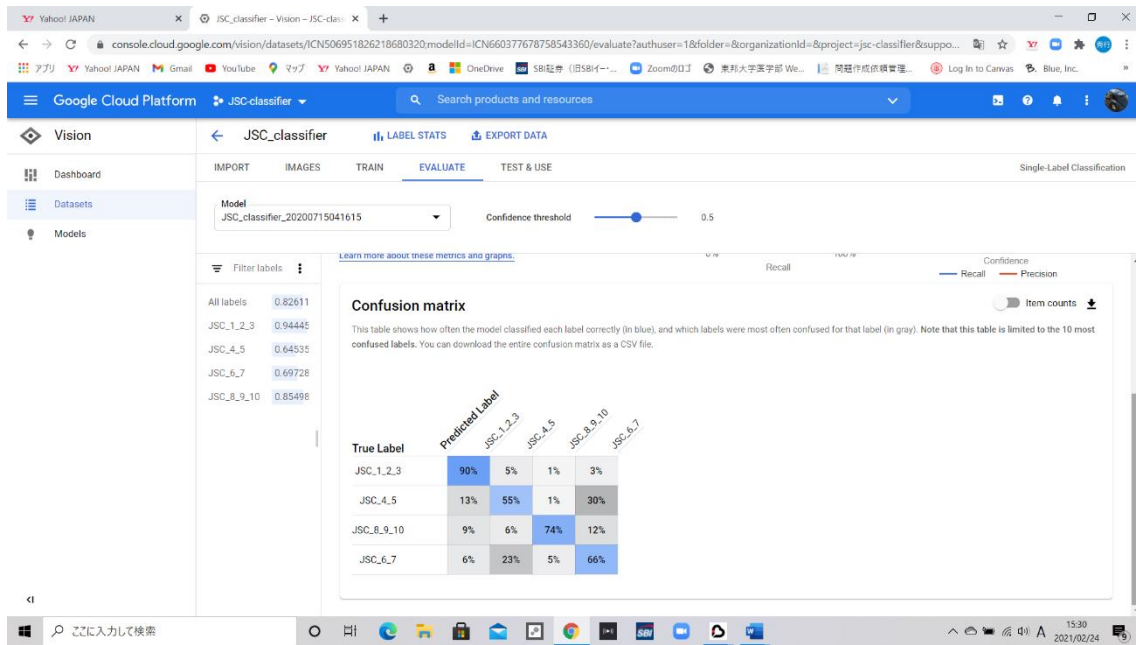

The precision was 88.74% and recall was 84.92% for a Johnsen score of 1-3. True positive, false negative, and false positive images are indicated.

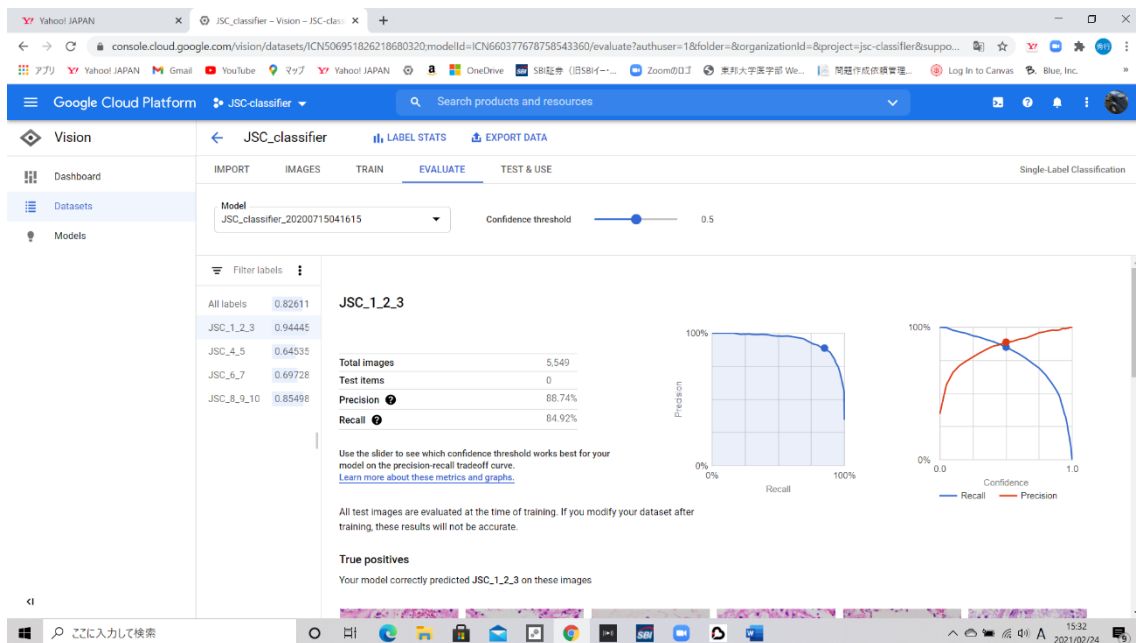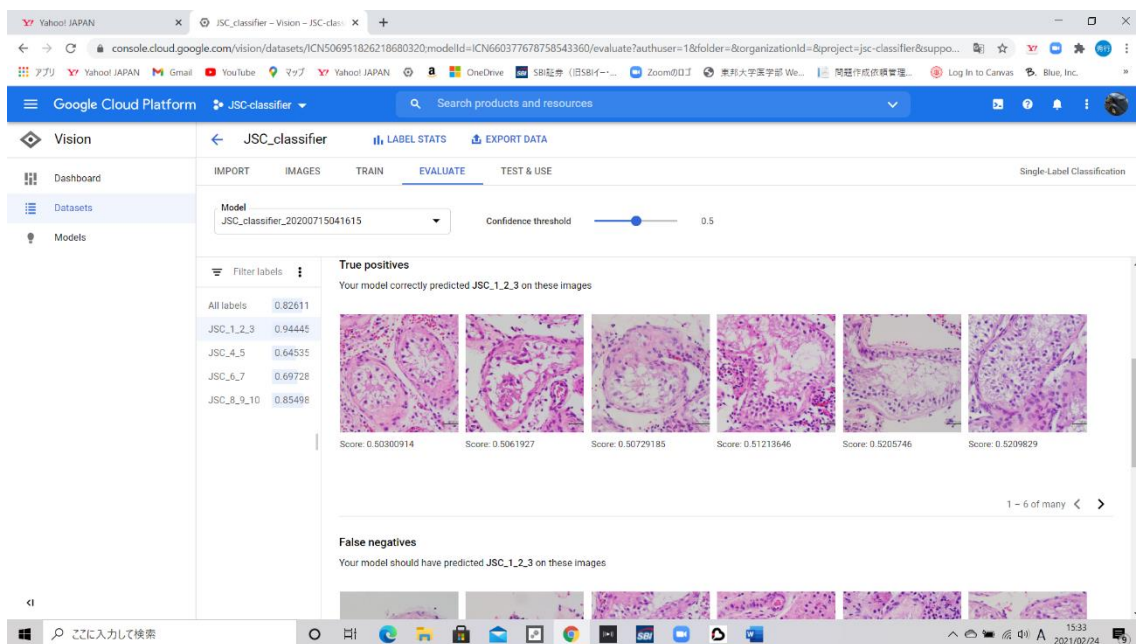

Google Cloud Platform Vision API interface showing evaluation results for the JSC\_classifier model. The model is JSC\_classifier\_20200715041615 with a confidence threshold of 0.5.

**Filter labels:**

| Label      | Score   |
|------------|---------|
| All labels | 0.82611 |
| JSC_1_2_3  | 0.94445 |
| JSC_4_5    | 0.64535 |
| JSC_6_7    | 0.69728 |
| JSC_8_9_10 | 0.85498 |

**False negatives:** Your model should have predicted JSC\_1\_2\_3 on these images.

| Image                                                                               | Score(s)   |
|-------------------------------------------------------------------------------------|------------|
| 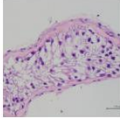   | 0.4955174  |
|    | 0.4995333  |
|    | 0.49501184 |
|   | 0.4766123  |
|  | 0.48730017 |
|  | 0.487054   |

**False positives:** Your model incorrectly predicted JSC\_1\_2\_3 on these images.

Google Cloud Platform Vision API interface showing evaluation results for the JSC\_classifier model. The model is JSC\_classifier\_20200715041615 with a confidence threshold of 0.5.

**Filter labels:**

| Label      | Score   |
|------------|---------|
| All labels | 0.82611 |
| JSC_1_2_3  | 0.94445 |
| JSC_4_5    | 0.64535 |
| JSC_6_7    | 0.69728 |
| JSC_8_9_10 | 0.85498 |

**False positives:** Your model incorrectly predicted JSC\_1\_2\_3 on these images.

| Image                                                                                 | Score      |
|---------------------------------------------------------------------------------------|------------|
| 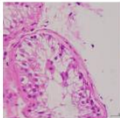   | 0.506111   |
|    | 0.50629357 |
|    | 0.5229429  |
|   | 0.5436324  |
|  | 0.5495402  |
|  | 0.5508962  |

The precision was 64.06% and recall was 37.77% for a Johnsen score of 4-5. True positive, false negative, and false positive images are indicated.

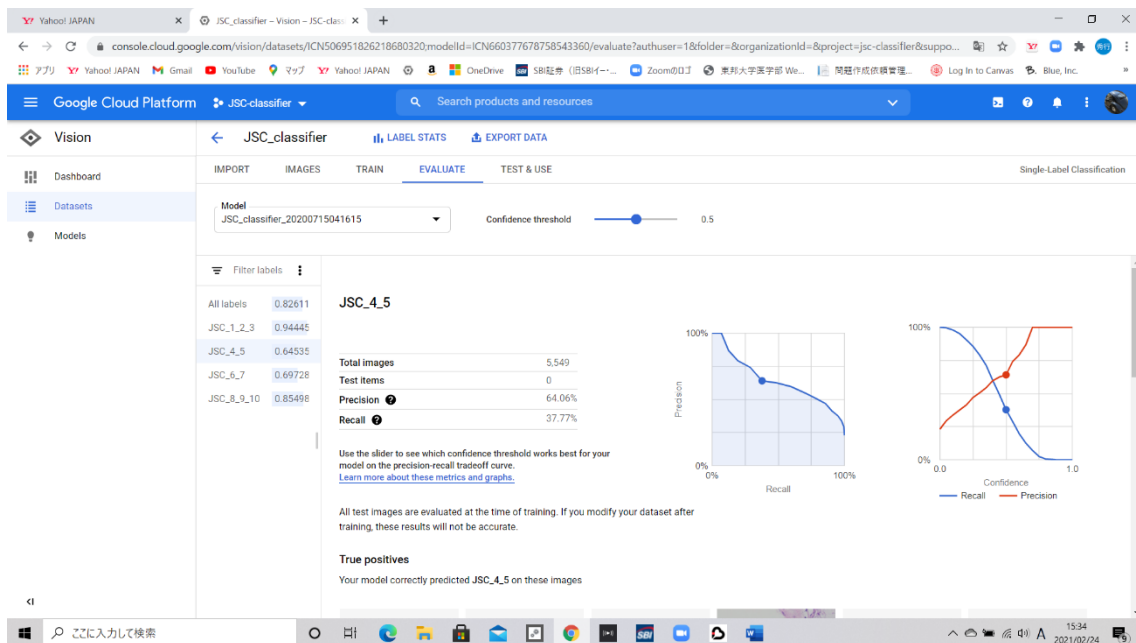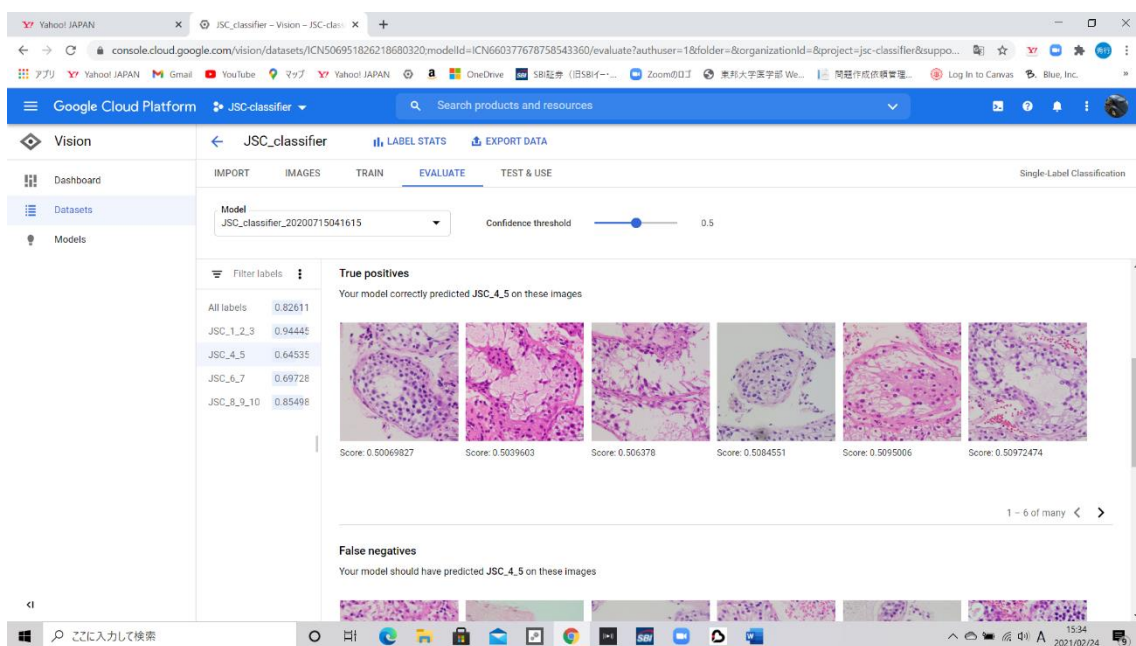

Google Cloud Platform Vision API interface for JSC\_classifier. The model selected is JSC\_classifier\_20200715041615. The confidence threshold is set to 0.5. The interface shows a list of labels on the left and a 'False negatives' section on the right. The 'False negatives' section displays six histology images that the model incorrectly classified as JSC\_4.5. Below the images, the scores for each are listed: 0.49015993, 0.49117517, 0.49306914, 0.4974781, 0.49106362, and 0.49746317.

| Label      | Score   |
|------------|---------|
| All labels | 0.82611 |
| JSC_1_2_3  | 0.94444 |
| JSC_4_5    | 0.64535 |
| JSC_6_7    | 0.69728 |
| JSC_8_9_10 | 0.85498 |

**False negatives**  
Your model should have predicted JSC\_4\_5 on these images

Score(s): 0.49015993    Score(s): 0.49117517    Score(s): 0.49306914    Score(s): 0.4974781    Score(s): 0.49106362    Score(s): 0.49746317

Google Cloud Platform Vision API interface for JSC\_classifier. The model selected is JSC\_classifier\_20200715041615. The confidence threshold is set to 0.5. The interface shows a list of labels on the left and a 'False positives' section on the right. The 'False positives' section displays six histology images that the model incorrectly classified as JSC\_4.5. Below the images, the scores for each are listed: 0.5005101, 0.50070107, 0.50211173, 0.50391006, 0.50409645, and 0.5042993.

| Label      | Score   |
|------------|---------|
| All labels | 0.82611 |
| JSC_1_2_3  | 0.94444 |
| JSC_4_5    | 0.64535 |
| JSC_6_7    | 0.69728 |
| JSC_8_9_10 | 0.85498 |

**False positives**  
Your model incorrectly predicted JSC\_4\_5 on these images

Score: 0.5005101    Score: 0.50070107    Score: 0.50211173    Score: 0.50391006    Score: 0.50409645    Score: 0.5042993



The precision was 72.39% and recall was 47.78% for a Johnsen score of 6-7. True positive, false negative, and false positive images are indicated.

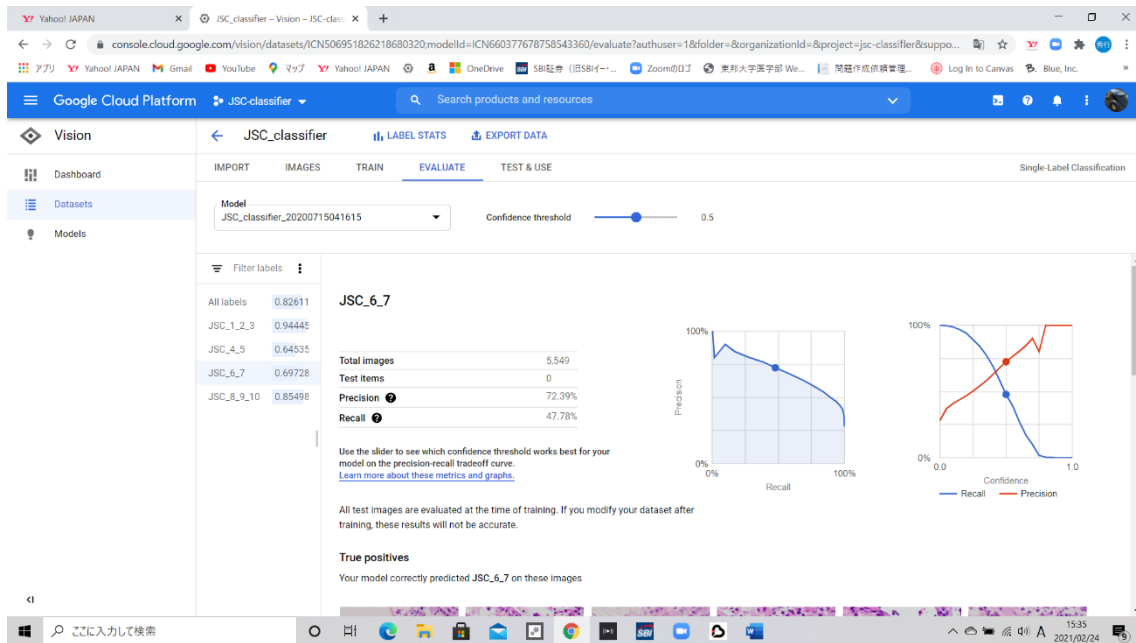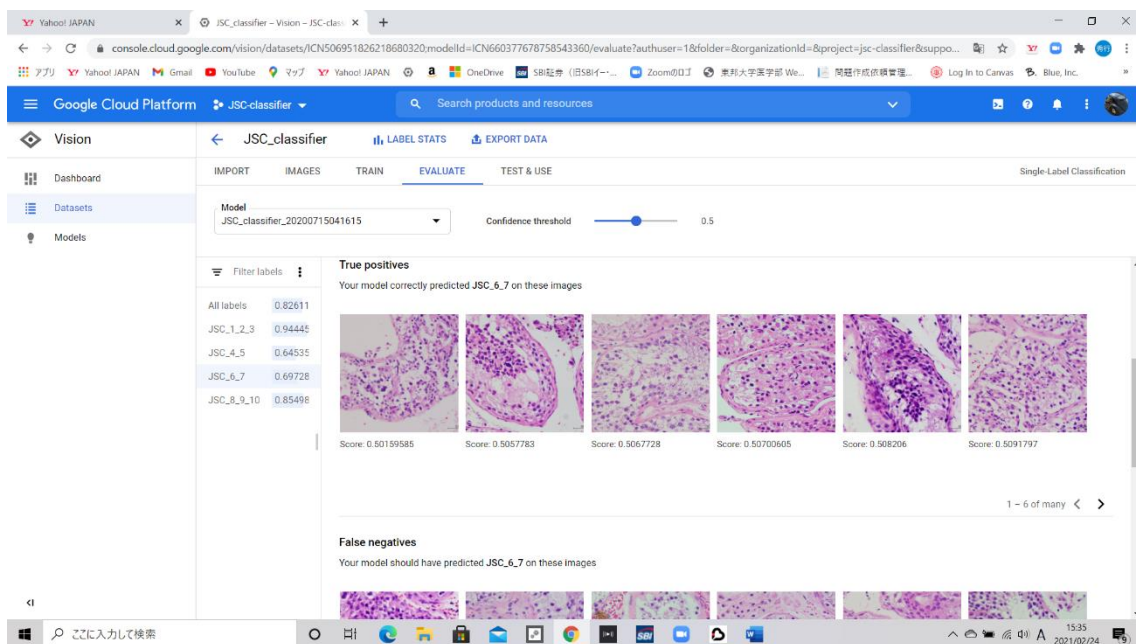

Google Cloud Platform Vision API interface for JSC\_classifier. The interface shows the 'EVALUATE' tab with a confidence threshold of 0.5. The 'Filter labels' section lists the following labels and their scores:

| Label      | Score   |
|------------|---------|
| All labels | 0.82611 |
| JSC_1_2_3  | 0.94444 |
| JSC_4_5    | 0.64535 |
| JSC_6_7    | 0.69728 |
| JSC_8_9_10 | 0.85498 |

The 'False negatives' section displays six histology images that the model incorrectly classified as JSC\_6\_7. The scores for these images are:

- Score(s): 0.49470612
- Score(s): 0.49559996
- Score(s): 0.4951952
- Score(s): 0.49427426
- Score(s): 0.49359143
- Score(s): 0.49630618

Google Cloud Platform Vision API interface for JSC\_classifier. The interface shows the 'EVALUATE' tab with a confidence threshold of 0.5. The 'Filter labels' section lists the following labels and their scores:

| Label      | Score   |
|------------|---------|
| All labels | 0.82611 |
| JSC_1_2_3  | 0.94444 |
| JSC_4_5    | 0.64535 |
| JSC_6_7    | 0.69728 |
| JSC_8_9_10 | 0.85498 |

The 'False positives' section displays six histology images that the model incorrectly classified as JSC\_6\_7. The scores for these images are:

- Score: 0.5000983
- Score: 0.50214577
- Score: 0.5065933
- Score: 0.507078
- Score: 0.507088
- Score: 0.51084286

The precision was 88.37% and recall was 65.8% for a Johnsen score of 8-10. True positive, false negative, and false positive images are indicated.

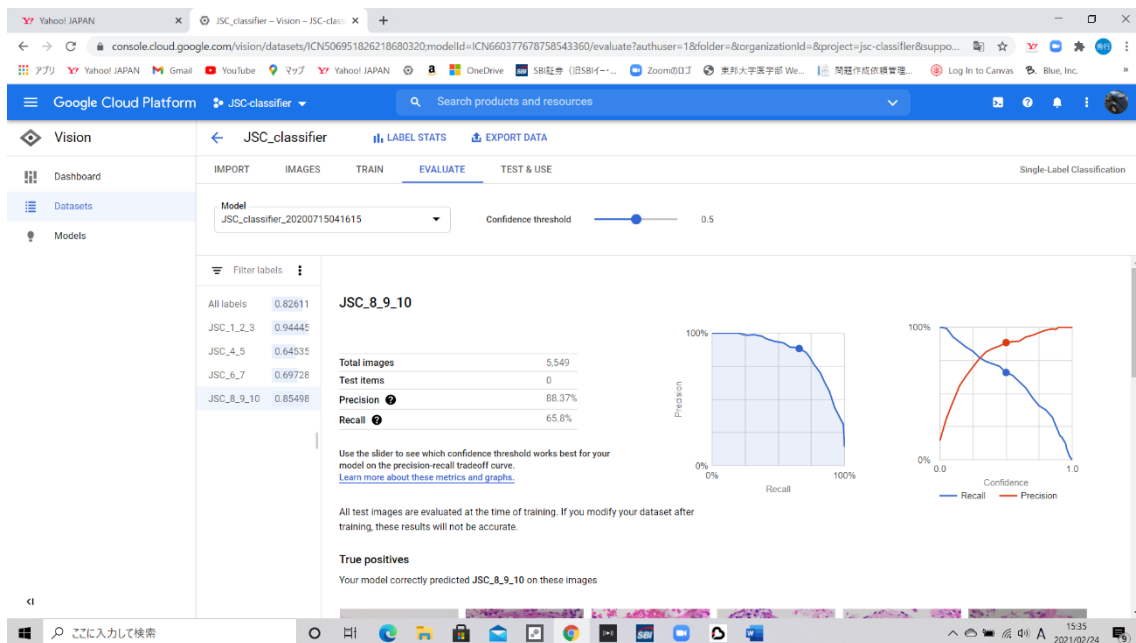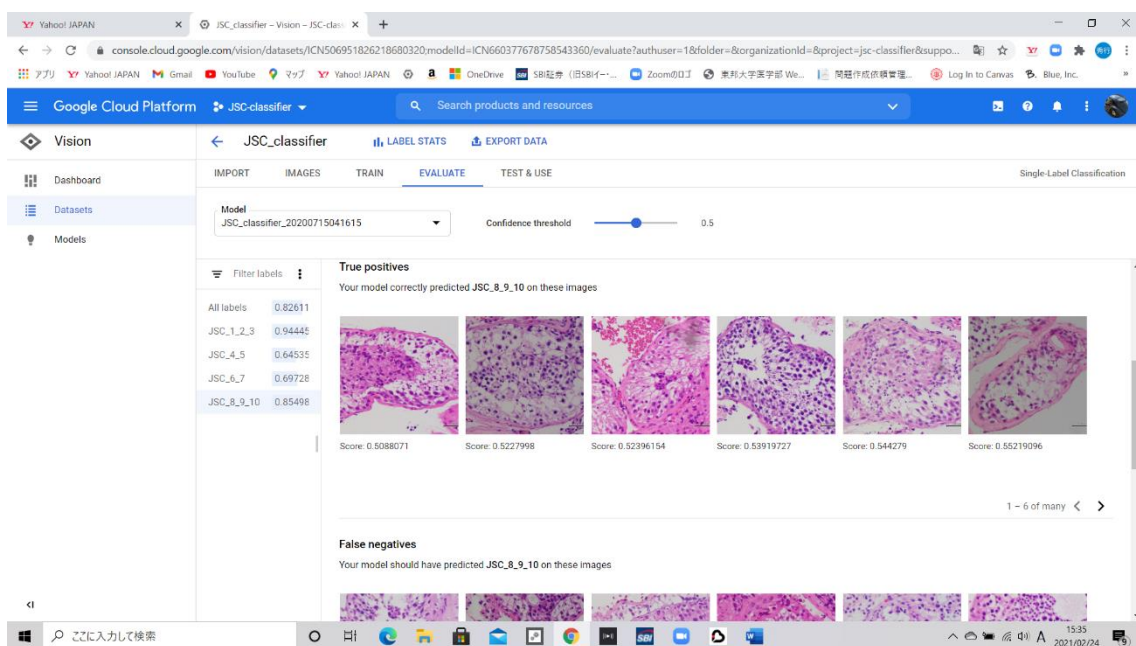

Google Cloud Platform Vision API interface for JSC\_classifier. The model is JSC\_classifier\_20200715041615. The confidence threshold is set to 0.5. The interface shows a list of labels on the left and a grid of images under the 'False negatives' section.

**Filter labels:**

|            |         |
|------------|---------|
| All labels | 0.82611 |
| JSC_1_2_3  | 0.94444 |
| JSC_4_5    | 0.64535 |
| JSC_6_7    | 0.69728 |
| JSC_8_9_10 | 0.85498 |

**False negatives:** Your model should have predicted JSC\_8\_9\_10 on these images.

|                                                                                   |                                                                                   |                                                                                   |                                                                                    |                                                                                     |                                                                                     |
|-----------------------------------------------------------------------------------|-----------------------------------------------------------------------------------|-----------------------------------------------------------------------------------|------------------------------------------------------------------------------------|-------------------------------------------------------------------------------------|-------------------------------------------------------------------------------------|
| 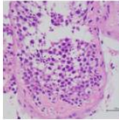 |  |  |  |  |  |
| Score(s): 0.49940252                                                              | Score(s): 0.49946204                                                              | Score(s): 0.48098984                                                              | Score(s): 0.49711955                                                               | Score(s): 0.47661543                                                                | Score(s): 0.49048218                                                                |

Google Cloud Platform Vision API interface for JSC\_classifier. The model is JSC\_classifier\_20200715041615. The confidence threshold is set to 0.5. The interface shows a list of labels on the left and a grid of images under the 'False positives' section.

**Filter labels:**

|            |         |
|------------|---------|
| All labels | 0.82611 |
| JSC_1_2_3  | 0.94444 |
| JSC_4_5    | 0.64535 |
| JSC_6_7    | 0.69728 |
| JSC_8_9_10 | 0.85498 |

**False positives:** Your model incorrectly predicted JSC\_8\_9\_10 on these images.

|                                                                                     |                                                                                     |                                                                                     |                                                                                      |                                                                                       |                                                                                       |
|-------------------------------------------------------------------------------------|-------------------------------------------------------------------------------------|-------------------------------------------------------------------------------------|--------------------------------------------------------------------------------------|---------------------------------------------------------------------------------------|---------------------------------------------------------------------------------------|
| 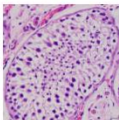 |  |  |  |  |  |
| Score: 0.50613654                                                                   | Score: 0.5077303                                                                    | Score: 0.5599204                                                                    | Score: 0.58292073                                                                    | Score: 0.6054845                                                                      | Score: 0.61686766                                                                     |

## JSC\_classifier\_Part 2: image dataset of 9822 expansion images (5.0 X 5.0 cm)

The average precision (positive predictive value) of the algorithm was 99.5%, precision was 96.29%, and recall was 96.23% for all labels.

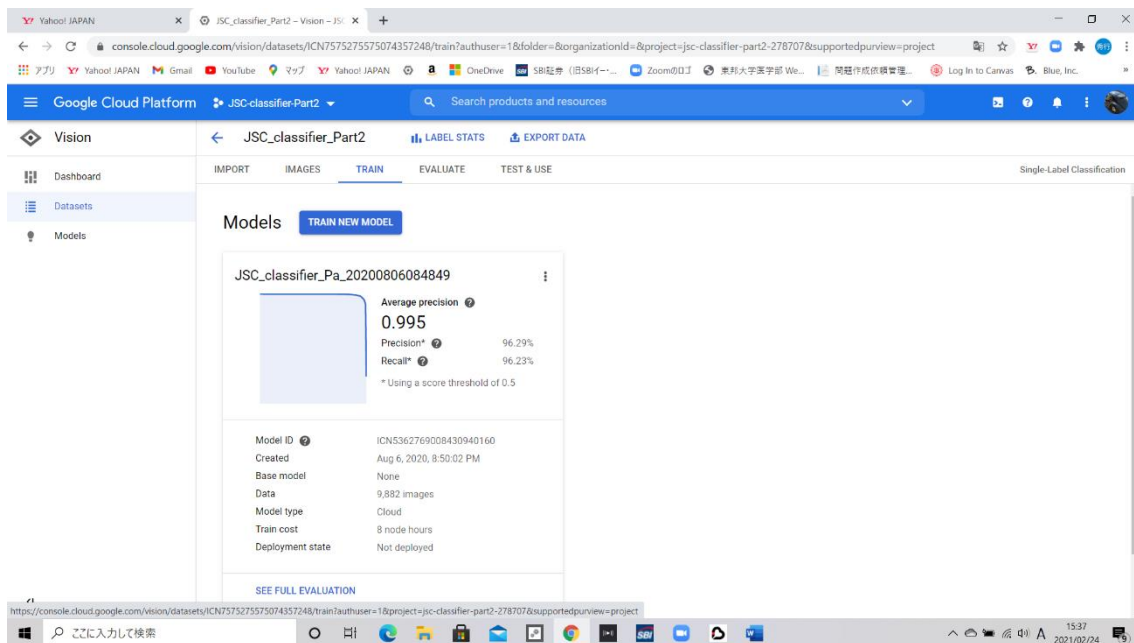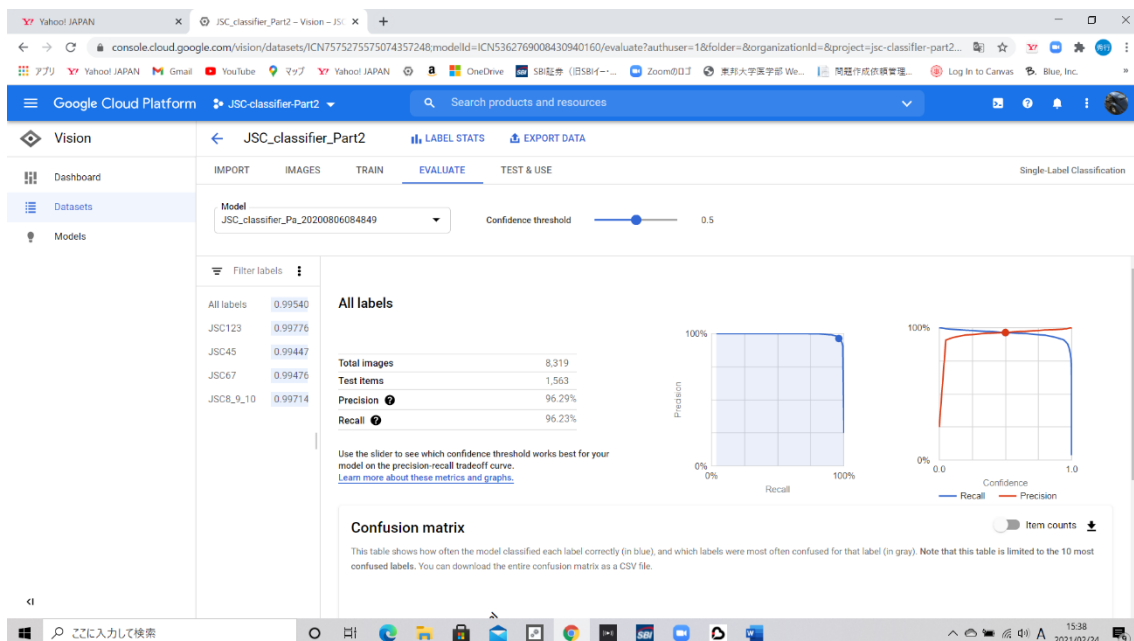

# Confusion matrix

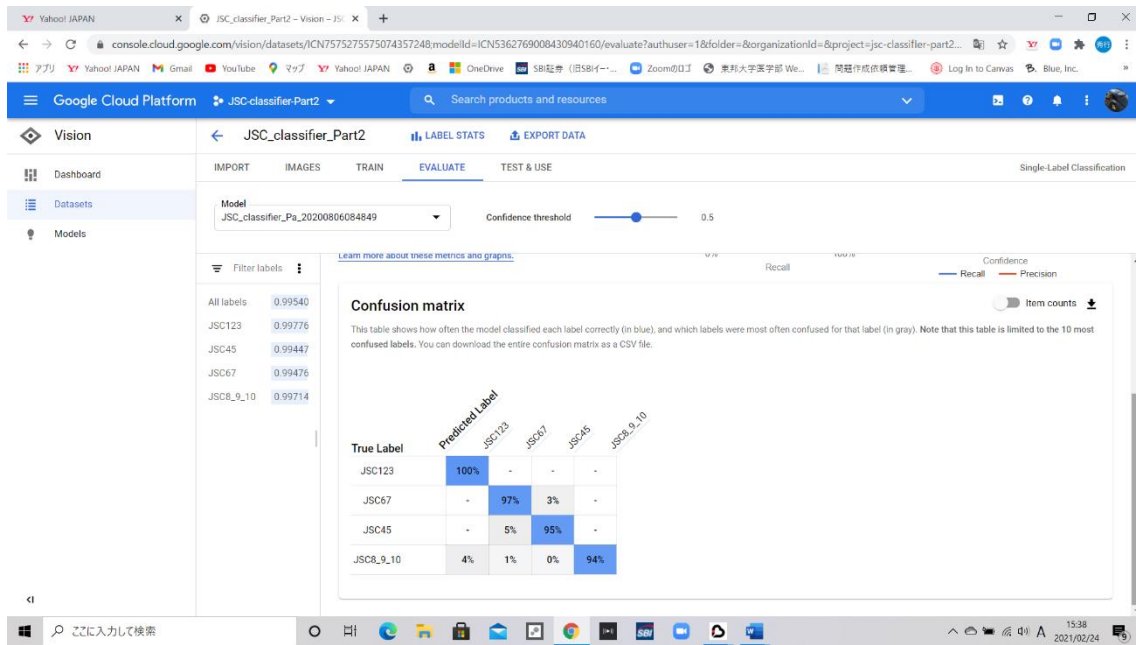

The precision was 95.82% and recall was 100% for a Johnsen score of 1-3. True positive and false positive images are indicated.

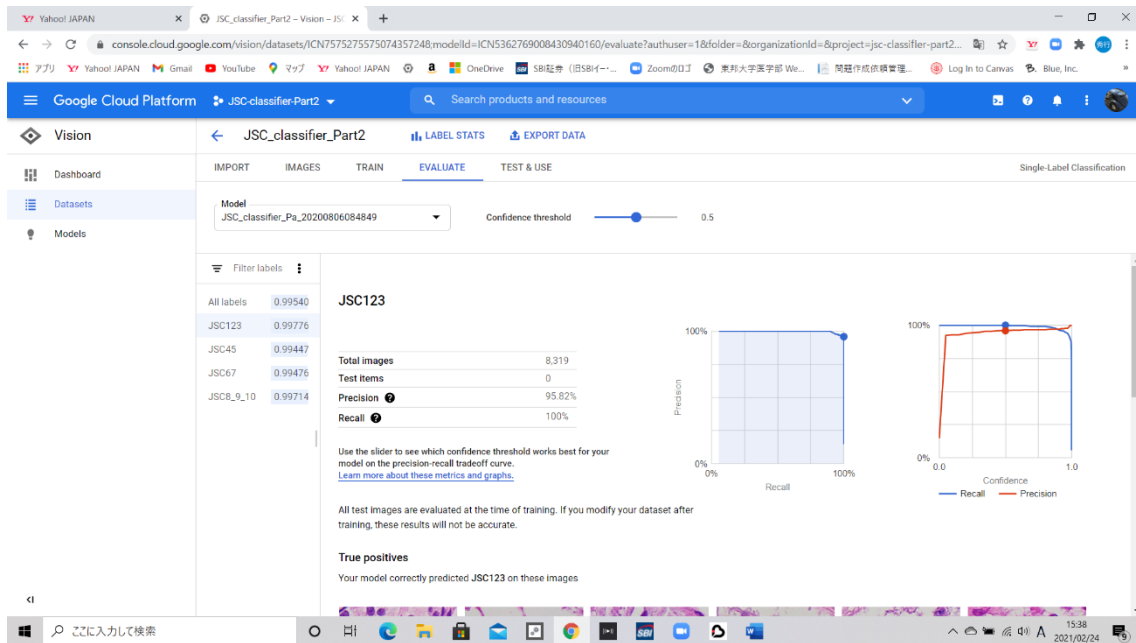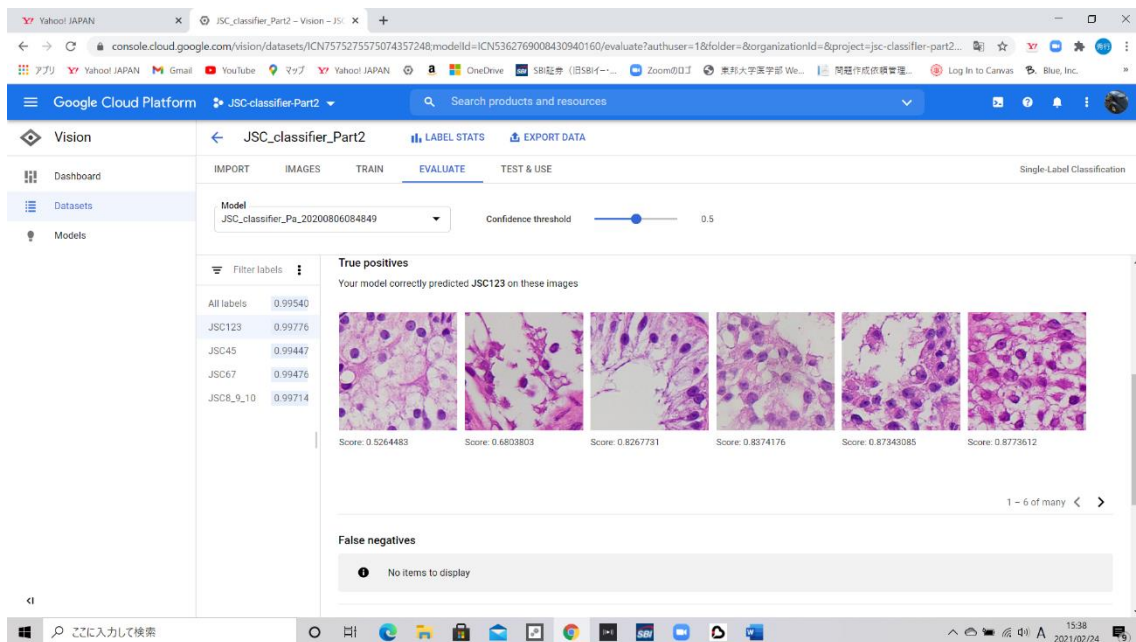

Google Cloud Platform Vision API Evaluation Page for JSC\_classifier\_Part2.

**Model:** JSC\_classifier\_Pa\_20200806084849

**Confidence threshold:** 0.5

**Filter Labels:**

| Label      | Score   |
|------------|---------|
| All labels | 0.99540 |
| JSC123     | 0.99776 |
| JSC45      | 0.99447 |
| JSC67      | 0.99476 |
| JSC8_9_10  | 0.99714 |

**False negatives:** No items to display

**False positives:** Your model incorrectly predicted JSC123 on these images

| Image                                                                               | Score      |
|-------------------------------------------------------------------------------------|------------|
| 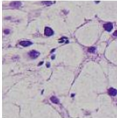   | 0.51657626 |
|    | 0.60036254 |
|    | 0.8062527  |
|   | 0.91387177 |
|  | 0.94386536 |
|  | 0.97502346 |

1 - 6 of many



The precision was 95.7% and recall was 95.11% for a Johnsen score of 4-5. True positive, false negative, and false positive images are indicated.

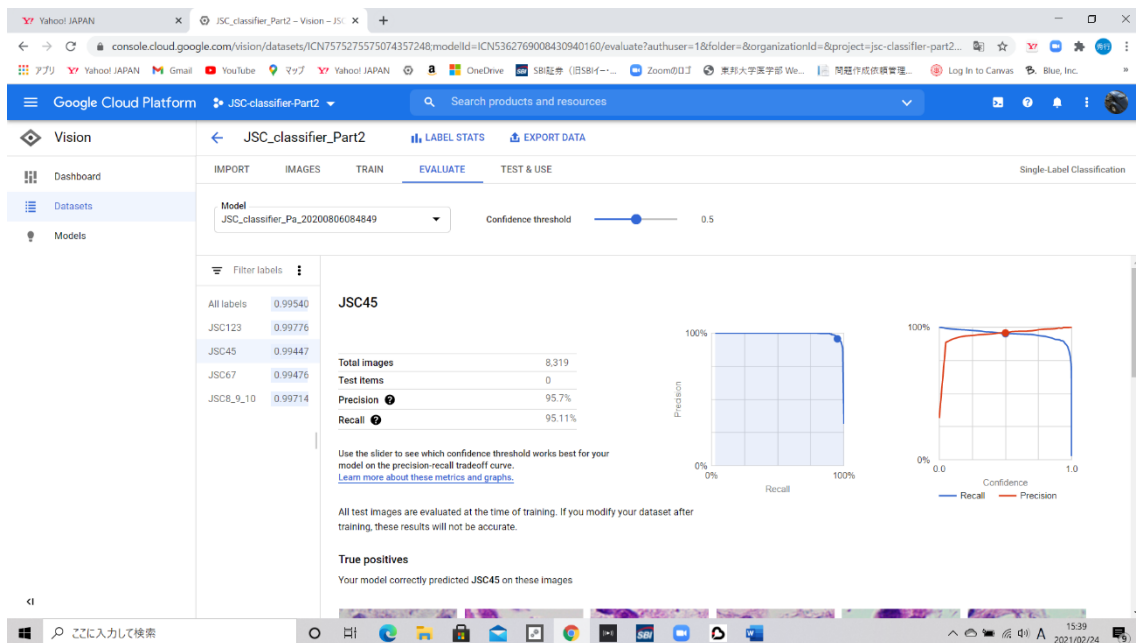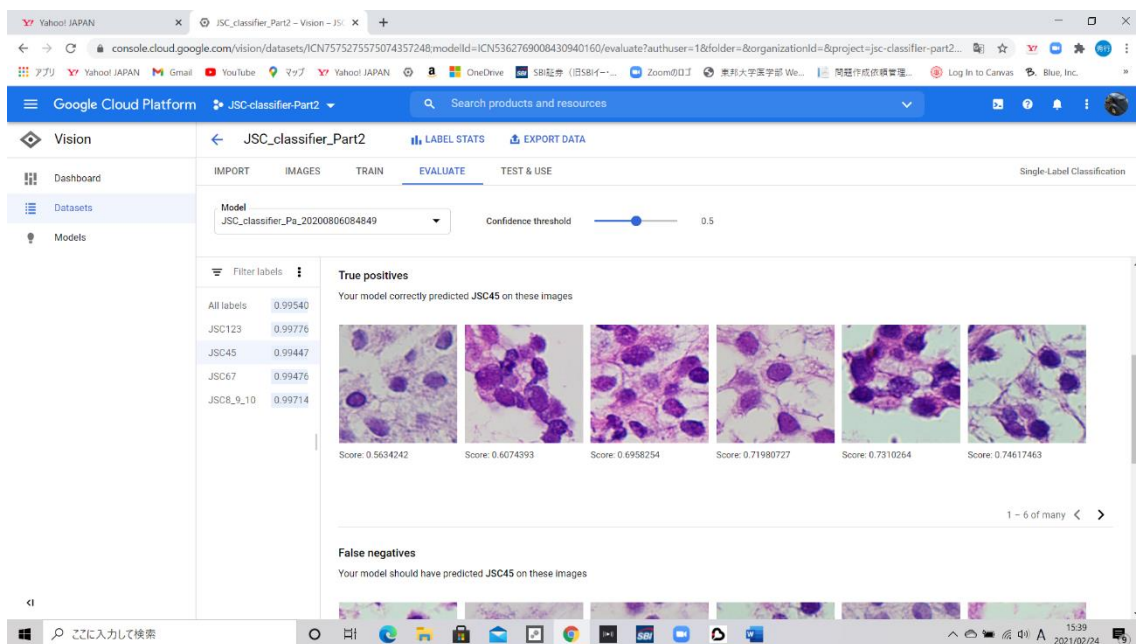

Google Cloud Platform Vision API Evaluation Page (Screenshot 1):

- Model:** JSC\_classifier\_Pa\_20200806084849
- Confidence threshold:** 0.5
- Filter labels:**
  - All labels: 0.99540
  - JSC123: 0.99776
  - JSC45: 0.99447
  - JSC67: 0.99476
  - JSC8\_9\_10: 0.99714
- False negatives:** Your model should have predicted JSC45 on these images.
  - Image 1: Score(s): 0.41148195
  - Image 2: Score(s): 0.45436364
  - Image 3: Score(s): 0.47549698
  - Image 4: Score(s): 0.41683275
  - Image 5: Score(s): 0.44331735
  - Image 6: Score(s): 0.40800672
- False positives:** Your model incorrectly predicted JSC45 on these images. (Images are visible but scores are not clearly legible).

Google Cloud Platform Vision API Evaluation Page (Screenshot 2):

- Model:** JSC\_classifier\_Pa\_20200806084849
- Confidence threshold:** 0.5
- Filter labels:**
  - All labels: 0.99540
  - JSC123: 0.99776
  - JSC45: 0.99447
  - JSC67: 0.99476
  - JSC8\_9\_10: 0.99714
- False positives:** Your model incorrectly predicted JSC45 on these images.
  - Image 1: Score: 0.5014175
  - Image 2: Score: 0.5203256
  - Image 3: Score: 0.52046686
  - Image 4: Score: 0.5414395
  - Image 5: Score: 0.5442471
  - Image 6: Score: 0.5719388

The precision was 95.51% and recall was 96.47% for a Johnsen score of 6-7. True positive, false negative, and false positive images are indicated.

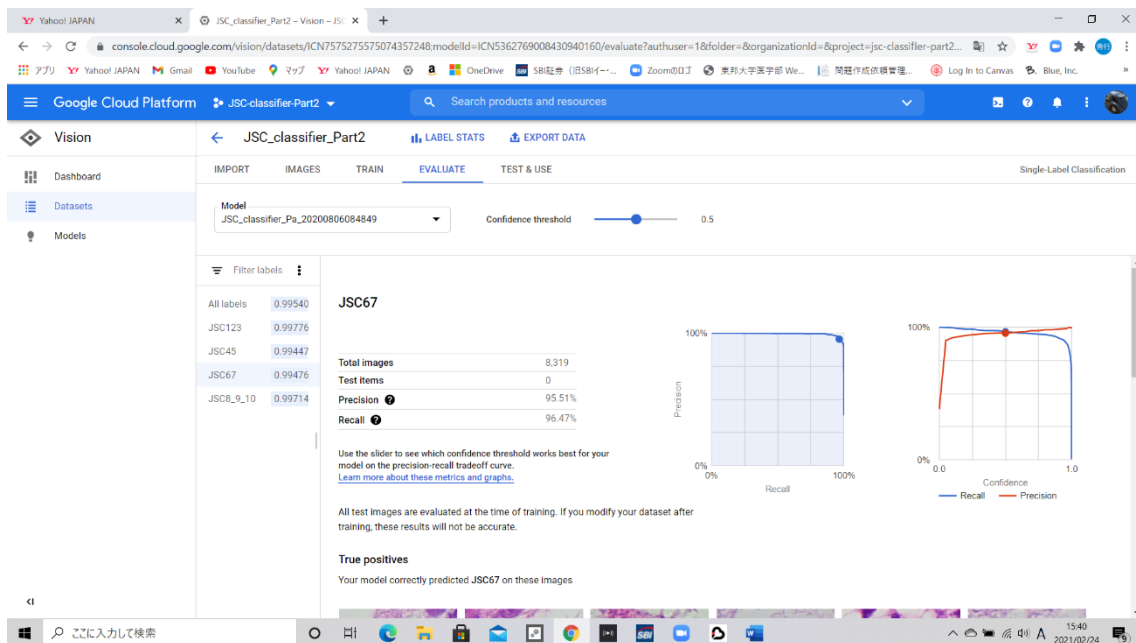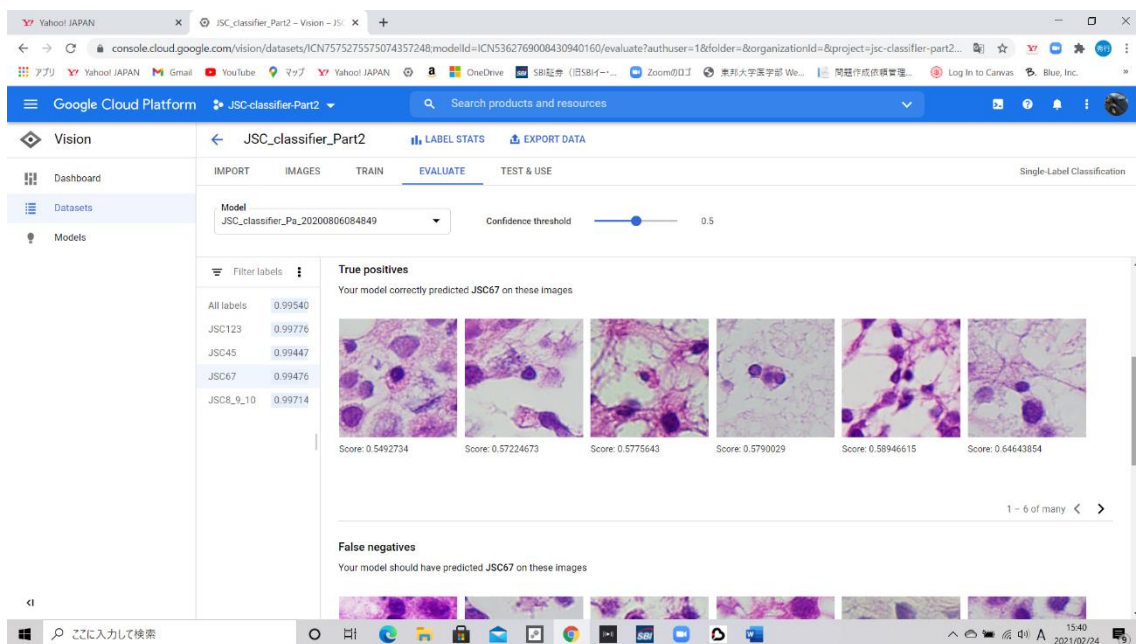

Google Cloud Platform Vision API Evaluation Page (Screenshot 1):

- Model:** JSC\_classifier\_Pa\_20200806084849
- Confidence threshold:** 0.5
- Filter labels:**
  - All labels: 0.99540
  - JSC123: 0.99776
  - JSC45: 0.99447
  - JSC67: 0.99476
  - JSC8\_9\_10: 0.99714
- False negatives:** Your model should have predicted JSC67 on these images.
  - Image 1: Score(s): 0.49531528
  - Image 2: Score(s): 0.45855585
  - Image 3: Score(s): 0.47967267
  - Image 4: Score(s): 0.42796662
  - Image 5: Score(s): 0.47953302
  - Image 6: Score(s): 0.49857822
- False positives:** Your model incorrectly predicted JSC67 on these images. (Images are visible but not clearly legible in this view)

Google Cloud Platform Vision API Evaluation Page (Screenshot 2):

- Model:** JSC\_classifier\_Pa\_20200806084849
- Confidence threshold:** 0.5
- Filter labels:**
  - All labels: 0.99540
  - JSC123: 0.99776
  - JSC45: 0.99447
  - JSC67: 0.99476
  - JSC8\_9\_10: 0.99714
- False positives:** Your model incorrectly predicted JSC67 on these images.
  - Image 1: Score: 0.524503
  - Image 2: Score: 0.54563326
  - Image 3: Score: 0.55668014
  - Image 4: Score: 0.583166
  - Image 5: Score: 0.58824676
  - Image 6: Score: 0.5919871

The precision was 100% and recall was 94.35% for a Johnsen score of 8-10. True positive and false negative images are indicated.

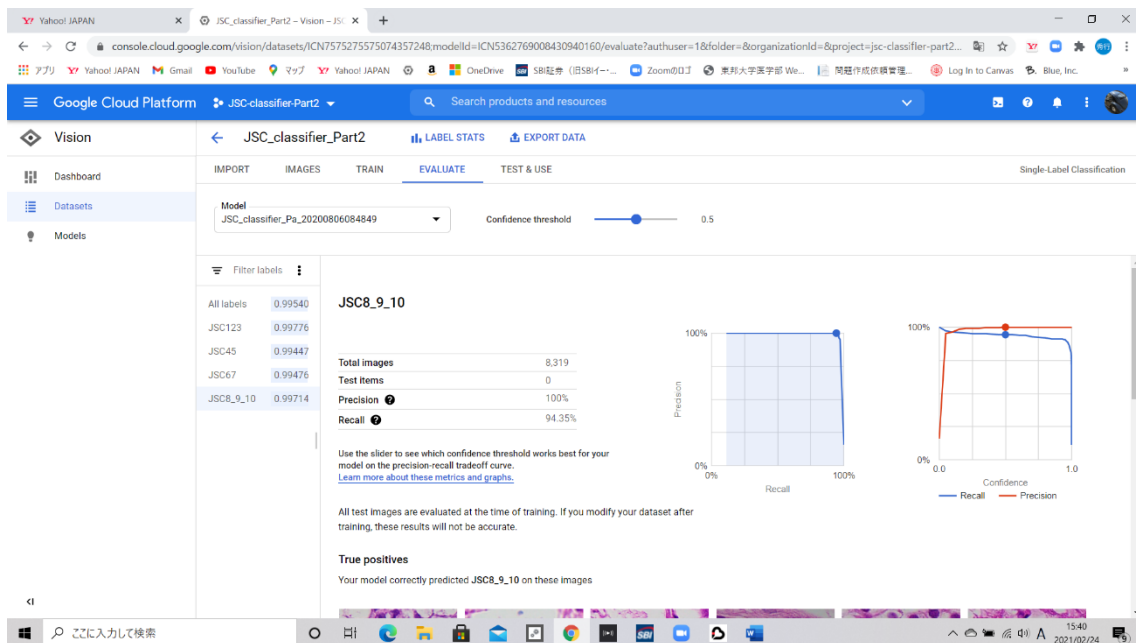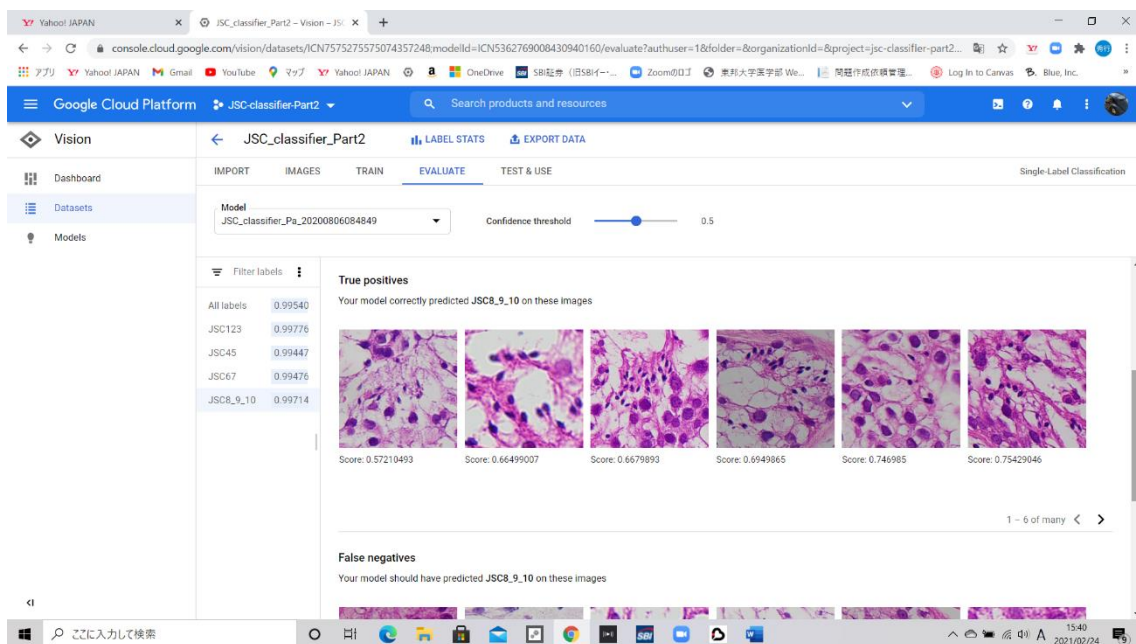

Google Cloud Platform Vision API interface for JSC\_classifier\_Part2. The interface shows the evaluation results for a model, specifically focusing on false negatives.

**Model:** JSC\_classifier\_Pa\_20200806084849  
**Confidence threshold:** 0.5

**Filter Labels:**

| Label      | Score(s) |
|------------|----------|
| All labels | 0.99540  |
| JSC123     | 0.99776  |
| JSC45      | 0.99447  |
| JSC67      | 0.99476  |
| JSC8_9_10  | 0.99714  |

**False negatives:**  
 Your model should have predicted JSC8\_9\_10 on these images

6 images are displayed with their respective scores:

| Image | Score(s)   |
|-------|------------|
|       | 0.19374532 |
|       | 0.42604476 |
|       | 0.21499024 |
|       | 0.39963624 |
|       | 0.08526694 |
|       | 0.13940889 |

1 - 6 of many

**False positives:**  
 No items to display
